# A sagittal gradient of pathological and compensatory effects of neurophysiological slowing in Parkinson's disease

Alex I. Wiesman<sup>1\*</sup>, Jason da Silva Castanheira<sup>1</sup>, Clotilde Degroot<sup>1</sup>, Edward A. Fon<sup>1</sup>, Sylvain Baillet<sup>1\*</sup>,  
PREVENT-AD Research Group<sup>‡</sup>, Quebec Parkinson Network

<sup>1</sup> Montreal Neurological Institute, McGill University, Montreal, Canada

\* Corresponding authors

## Correspondence:

Alex I. Wiesman, PhD  
McConnell Brain Imaging Centre  
Montreal Neurological Institute  
McGill University, Montreal QC  
alexander.wiesman@mcgill.ca

Sylvain Baillet, PhD  
McConnell Brain Imaging Centre  
Montreal Neurological Institute  
McGill University, Montreal QC  
sylvain.baillet@mcgill.ca

---

<sup>‡</sup>Data used in preparation of this article were obtained from the Pre-symptomatic Evaluation of Novel or Experimental Treatments for Alzheimer's Disease (PREVENT-AD) program (<https://douglas.research.mcgill.ca/stop-ad-centre>), data release 6.0. A complete listing of PREVENT-AD Research Group can be found in the PREVENT-AD database: [https://preventad.loris.ca/acknowledgements/acknowledgements.php?date=\[2022-02-01\]](https://preventad.loris.ca/acknowledgements/acknowledgements.php?date=[2022-02-01]). The investigators of the PREVENT-AD program contributed to the design and implementation of PREVENT-AD and/or provided data but did not participate in analysis or writing of this report.

## 1 Abstract

2 Using magnetoencephalographic imaging and extensive clinical and neuropsychological assessments, we  
3 show that patients with Parkinson’s disease (PD; N = 79) exhibit a slowing of neurophysiological activity  
4 relative to healthy adults (N = 65), which relates to motor and cognitive abilities. Importantly, the  
5 association between neurophysiological slowing and PD clinical features varies systematically across the  
6 cortex along a sagittal gradient: cortical slowing is associated with worse impairment in dorsal-posterior  
7 cortices, and this association is reversed in ventral-anterior cortical regions. This pathological-to-  
8 compensatory anatomical gradient is sensitive to differences in patients’ individual clinical profiles, and co-  
9 localizes with normative atlases of neurotransmitter receptor/transporter density. Long-range functional  
10 connectivity between posterior regions and parietal and frontal cortices is also significantly shifted towards  
11 lower frequencies in PD, demonstrating a novel network-level slowing effect. Taken together, these  
12 findings demonstrate the multifaceted nature of neurophysiological slowing in patients with PD, with  
13 anatomically-dependent clinical relevance to motor and cognitive symptoms.

## 1 Introduction

2 Parkinson's disease (PD) is the second most common neurodegenerative disorder worldwide<sup>1</sup>. It is  
3 characterized by hallmark declines in motor functions<sup>2</sup>, with many patients also experiencing debilitating  
4 declines in cognitive abilities<sup>3</sup>. Although the etiology of PD is not clear to date, the neuropathological  
5 process includes a progressive degeneration of dopaminergic neurons and glial cells in the substantia nigra  
6 pars compacta, leading to dysfunctional dopamine (DA) signaling along the nigrostriatal pathway<sup>2</sup>. This  
7 leads to over-inhibition of thalamic projections to the cortex that are essential for the accurate execution  
8 of voluntary movements in the healthy brain<sup>2</sup>. Changes in cortical signaling are also well-documented in  
9 PD, yet the functional consequences of these cortical aberrations are not entirely clear. Some research has  
10 suggested that they convey compensatory effects (i.e., greater changes relative to healthy controls relating  
11 to better clinical outcomes) while others have instead indicated that they are deleterious<sup>4-19</sup>. These effects  
12 may not be mutually exclusive. Complex patterns of neurophysiological changes observed in patients with  
13 PD may simultaneously indicate both dysfunction and adaptive compensation, alongside additional effects  
14 of pharmacotherapies and clinical interventions intended to remediate PD symptoms. A more nuanced  
15 understanding of pathological versus compensatory effects of PD-related neurophysiological changes is  
16 needed to inform and advance interventions, such as targeted neuromodulation strategies to ameliorate  
17 symptoms and enhance compensatory capabilities in patients with PD<sup>20-28</sup>.

18 Neurophysiological indicators of PD pathophysiology include frequency-specific components of the rich  
19 spectrum of brain electrophysiology. Notably, beta-band (15 – 30 Hz) activity is hypersynchronous across  
20 the cortico-basal ganglia circuit in patients with PD<sup>17,29-33</sup>, relates to severity of motor dysfunction, and can  
21 be normalized by common therapeutics<sup>34-38</sup>. In the cortex of patients with PD, decades of  
22 electrophysiological studies have demonstrated a stereotyped pattern of frequency-defined neural  
23 changes relative to healthy adults, including both increased activity in low-frequency bands (e.g., delta [2 –  
24 4 Hz] and theta [5 – 7 Hz]) and concurrent decreased power in high-frequency bands (e.g., alpha [8 – 12  
25 Hz] and beta)<sup>12,39-42</sup>. This has led to a hypothesized *slowing* of brain activity in patients with PD, but it  
26 remains unclear whether such a neurophysiological effect relates to clinical features of the disease, and  
27 whether any such relationships are of a deleterious or compensatory nature. These multi-spectral  
28 deviations from healthy levels also comprise rhythmic and/or arrhythmic components<sup>43-46</sup>, for which clinical  
29 interpretation and significance for frequency-specific neuromodulation therapies remain to be established  
30 in PD<sup>19,42,47-51</sup>.

31 We adapted a recent measure of neurophysiological slowing<sup>52</sup> (Figure 1A) with magnetoencephalography  
32 (MEG) data from a large sample of patients with PD (N = 79) and a matched group of healthy older adults  
33 (N = 65). We related neurophysiological slowing effects measured in the PD group to detailed clinical and  
34 neuropsychological indicators of motor and cognitive deficits, with the hypothesis that stronger cortical  
35 slowing is associated with greater clinical impairments. What we actually observed was that this association  
36 varied in a structured manner across the cortex, indicating a progressive change from compensation to  
37 impairment along the sagittal cortical plane (Figure 1B). To determine the clinical and neurochemical nature  
38 of this sagittal gradient effect, we investigate its sensitivity to clinical profile features and neurotransmitter  
39 receptor densities that are salient in PD. Finally, we provide evidence that cortical slowing also affects  
40 frequency-specific, inter-regional functional connectivity, which indicates a network-level slowing of  
41 neurophysiology in patients with PD.

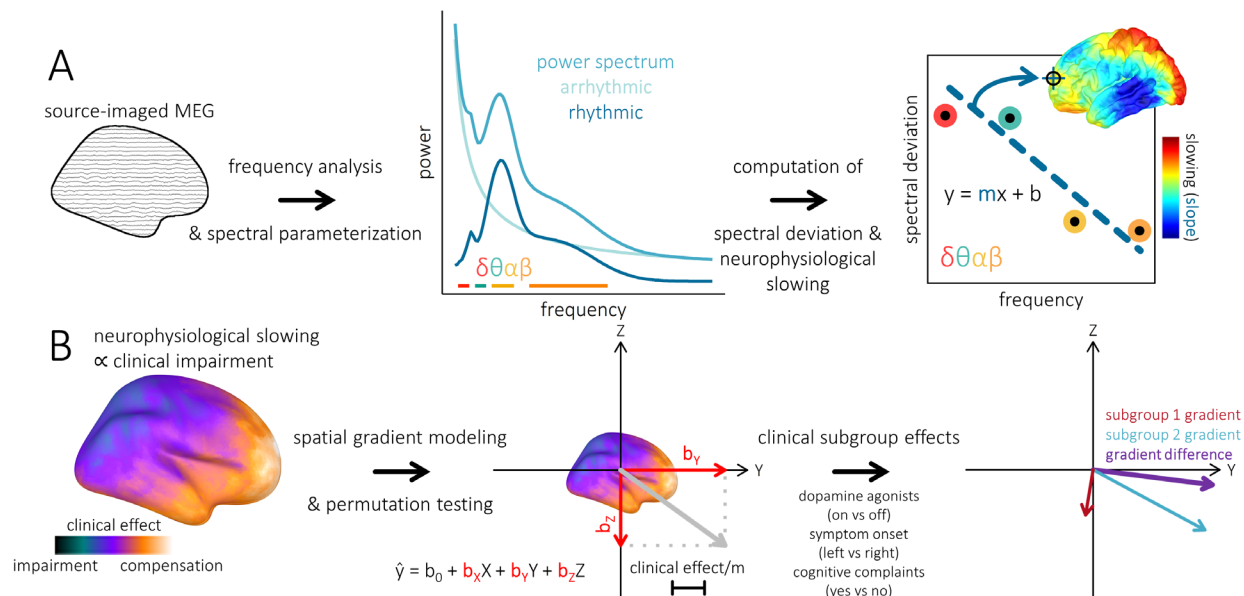

**Figure 1. Neurophysiological slowing and anatomical gradient analyses.** (A) Neural slowing computation. Source-imaged magnetoencephalography (MEG) data is first frequency-transformed and the vertex-wise power spectral densities (PSD) parameterized using *specparam*. The resulting PSDs are averaged over typical frequency bands (i.e., delta: 2–4 Hz; theta: 5–7 Hz; alpha: 8–12 Hz; beta: 15–29 Hz) and each spectrally- and spatially-resolved power estimate of neurophysiological signal per patient is normalized to the mean and standard deviation of the comparable estimates in the healthy control group. Within each patient and at each spatial location, a linear model is then fit to these spectral deviations across frequencies, and the slope of this model is extracted that represents the relative slowing (i.e., negative slope values) of brain activity relative to healthy levels. This procedure is performed per cortical vertex, resulting in a spatially-resolved map of neurophysiological slowing per patient. (B) Spatial gradient analysis. Cortical surfaces are first smoothed to reduce the impact of gyrification on the estimation of spatial gradient effects. Per each vertex location, neurophysiological slowing values are separately correlated with motor (i.e., UPDRS-III scores) and cognitive (i.e., sign-reversed neuropsychological scores averaged over cognitive domains) impairments, beyond the effects of age. These partial correlation maps are then linearly-scaled (i.e., using the Fisher-transform) and summed per vertex, resulting in a single cortical map showing the nature and strength of the relationships between neurophysiological slowing and clinical impairments across the brain. A linear multiple regression is then fit to these data and the beta weights extracted, with each of the cardinal axes (X: left – right; Y: posterior – anterior; Z: inferior – superior) represented as a predictor. The neurophysiological slowing data are then randomly permuted across patients and the partial correlation and spatial multiple regression steps repeated 1,000 times, with the resulting beta weights extracted and used to build null distributions per each predictor. To test for the effect of binary clinical factors on these gradients, the same procedure is performed within each binarized patient subgroup, with the difference in beta weights between the two subgroups used as the statistic of interest.

## 1 Results

### 2 Slowing of Rhythmic and Arrhythmic Neurophysiological Activity Relates Differentially to Clinical 3 Impairments

4 Patients with Parkinson’s disease exhibited slowing of cortical neurophysiological activity, with the  
5 strongest effects in bilateral parieto-occipital cortices (TFCE;  $p_{FWE} < .001$ ; peak vertex = x: -50, y: -77, z: 1;  
6 Figure 2A). The magnitude of this slowing effect was related to cognitive abilities (Figure 2B) including  
7 general cognitive function in left superior frontal cortex (TFCE;  $p_{FWE} = .048$ ; peak vertex = x: -4, y: 63, z: 20),  
8 as well as domain-specific impairments in language in bilateral prefrontal and temporal regions (TFCE;  $p_{FWE}$   
9 = .012; peak vertex = x: 4, y: 38, z: 11), attention in bilateral inferior frontal and somatomotor cortices

- 1 (TFCE;  $p_{FWE} = .030$ ; peak vertex = x: 50, y: -13, z: 52), and visuospatial function in bilateral anterior temporal
- 2 regions (TFCE;  $p_{FWE} = .014$ ; peak vertex = x: -49, y: -8, z: -44).

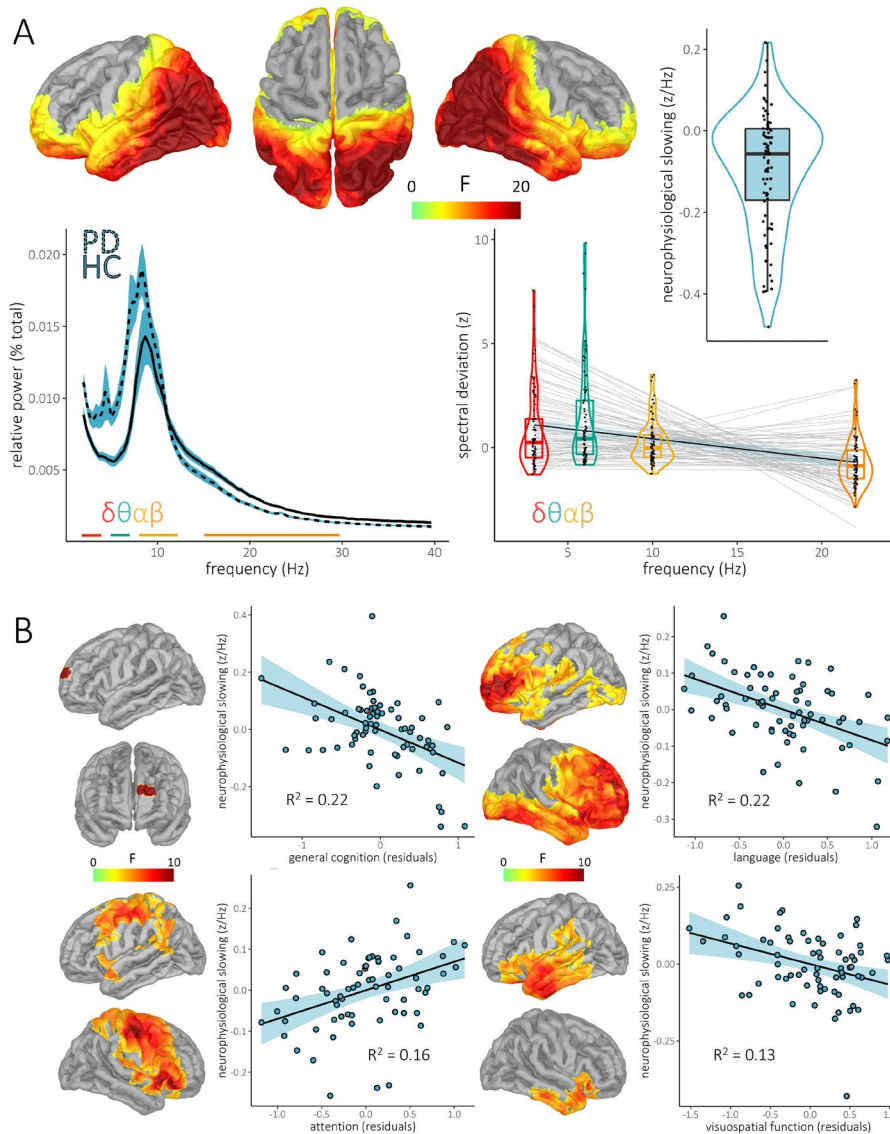

**Figure 2. Neurophysiological slowing associated with cognitive abilities in Parkinson's disease.** (A) Cortical maps indicate significant clusters of neurophysiological slowing in patients with Parkinson's disease (PD) after stringent multiple comparisons correction. Power spectra to the bottom left indicate the underlying data used to compute neurophysiological slowing from the cortical vertex exhibiting the strongest effect, with colored bars underneath showing the bandwidths of typical frequency-band definitions used for averaging. The plot to the bottom right shows the individual patient spectral deviations at this same cortical vertex for each frequency band, with the light grey lines-of-best fit indicating individual neurophysiological slowing slopes, and the overlaid black line and blue shaded area representing the overall group effect and 95% confidence intervals, respectively. These individual and mean neurophysiological slowing effects are also represented as single dots in the scatterplot to the top right. (B) Cortical maps indicate significant clusters where neurophysiological slowing was associated with cognitive function in patients with PD. Associated scatterplots indicate the nature and strength of this relationship at the cortical vertex exhibiting the strongest effect, with lines-of-best-fit, 95% confidence intervals, and  $R^2$  values overlaid.

- 3 Both arrhythmic (TFCE;  $p_{FWE} < .001$ ; peak vertex = x: 45, y: -81, z: 7; Figure 3A) and rhythmic (TFCE;  $p_{FWE} <$
- 4  $.001$ ; peak vertex = x: 43, y: -71, z: 31; Figure 4A) neurophysiological generators contributed to the slowing
- 5 effect. Arrhythmic slowing was stronger than rhythmic slowing in bilateral inferior frontal regions (TFCE;
- 6  $p_{FWE} = .018$ ; peak vertex = x: 9, y: 40, z: -5; Figure S1), and no clusters were identified where rhythmic
- 7 slowing was significantly stronger than arrhythmic. Arrhythmic cortical slowing was associated with motor
- 8 impairments in bilateral prefrontal and temporal cortices (i.e., UPDRS-III scores; TFCE;  $p_{FWE} = .028$ ; peak
- 9 vertex = x: -41, y: 43, z: 19; Figure 3B), as well as domain-specific abilities in language in distributed frontal,
- 10 temporal, and occipital areas (TFCE;  $p_{FWE} = .013$ ; peak vertex = x: 49, y: -4, z: -9; Figure 3B), attention in right
- 11 superior parietal cortex (TFCE;  $p_{FWE} = .043$ ; peak vertex = x: 23, y: -54, z: 68; Figure 3B), and executive
- 12 function in right fusiform/lingual cortex (TFCE;  $p_{FWE} = .047$ ; peak vertex = x: 14, y: -54, z: -7; Figure 3B).
- 13 Rhythmic neurophysiological slowing covaried only with attention abilities in right inferior frontal cortex
- 14 (TFCE;  $p_{FWE} = .039$ ; peak vertex = x: 50, y: 32, z: -13; Figure 3B).

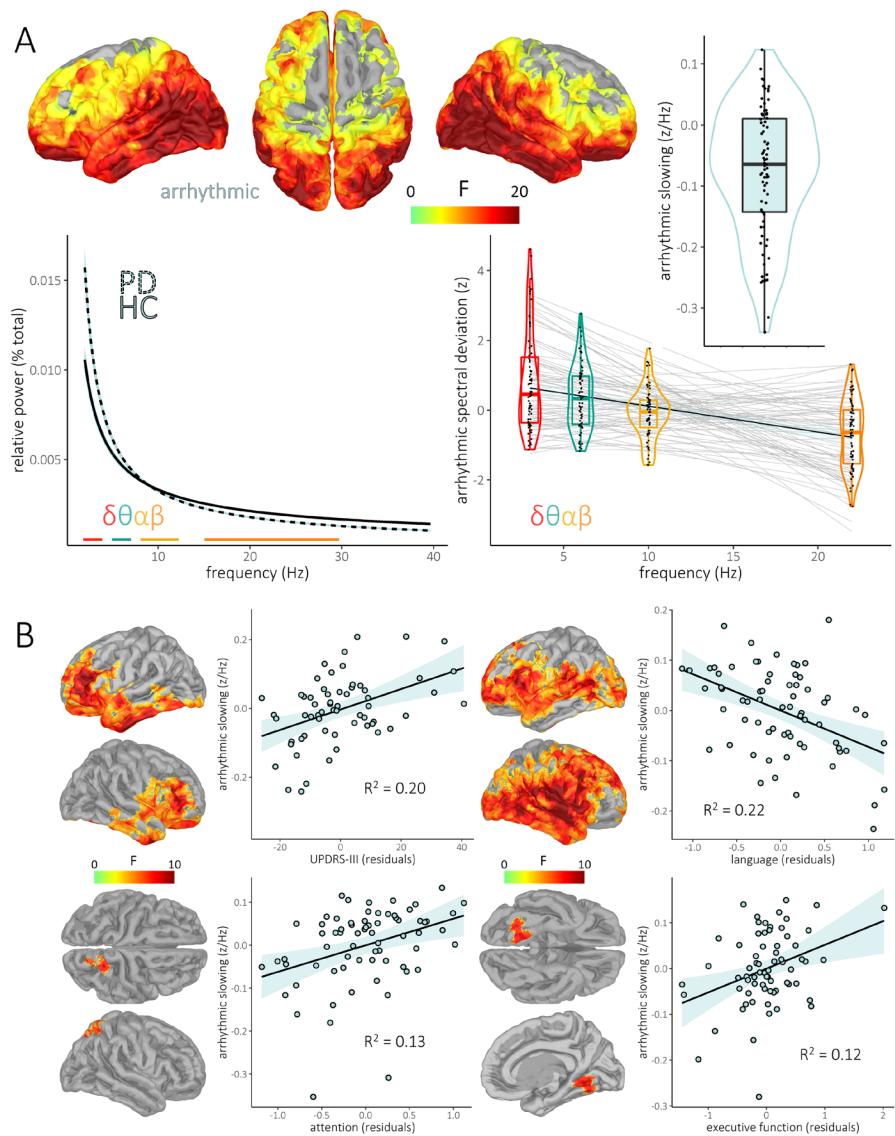

**Figure 3. Arrhythmic neurophysiological slowing associated with clinical impairments in Parkinson's disease.** Similar to Figure 2, but with neurophysiological slowing computed using the arrhythmic (i.e., aperiodic) component of the parameterized spectra. (A) Cortical maps indicate significant clusters of arrhythmic neurophysiological slowing in patients with Parkinson's disease (PD) after stringent multiple comparisons correction. Power spectra to the bottom left indicate the underlying data used to compute neurophysiological slowing from the cortical vertex exhibiting the strongest effect, with colored bars underneath showing the bandwidths of typical frequency-band definitions used for averaging. The plot to the bottom right shows the individual patient spectral deviations at this same cortical vertex for each frequency, with the light grey lines-of-best fit indicating individual neurophysiological slowing slopes, and the overlaid black line and blue shaded area representing the overall group effect and 95% confidence intervals, respectively. These individual and mean neurophysiological slowing effects are also represented as single dots in the scatterplot to the top right. (B) Cortical maps indicate significant clusters where neurophysiological slowing was associated with cognitive function in patients with PD. Associated scatterplots indicate the nature and strength of this relationship at the cortical vertex exhibiting the strongest effect, with lines-of-best-fit, 95% confidence intervals, and  $R^2$  values overlaid.

1 Mean neurophysiological slowing values per each region of the Yeo 7-networks atlas<sup>74</sup> indicated greatest  
 2 slowing in visual and dorsal attention networks, and weakest effects in somato-motor, ventral attention,  
 3 and fronto-parietal networks (Figure S1). All the reported slowing effects and relationships to clinical  
 4 metrics remained significant (all  $p$ 's < .005) after inclusion of confounds in the respective linear models,  
 5 including head motion, eye movements, heart rate variability, and the number of epochs used per  
 6 participant for analysis.

7 *Associations Between Neurophysiological Slowing and Clinical Impairments Exhibit a Spatial*  
 8 *Gradient Across the Cortex*

9 We observed that the nature of the relationships between cortical slowing and clinical impairments  
 10 changed systematically across the sagittal plane of the cortex, with more posterior relationships generally  
 11 indicating impairment (i.e., greater slowing associated with worse cognitive outcomes) and more anterior  
 12 relationships indicating compensation. To test this effect empirically, we developed and implemented a

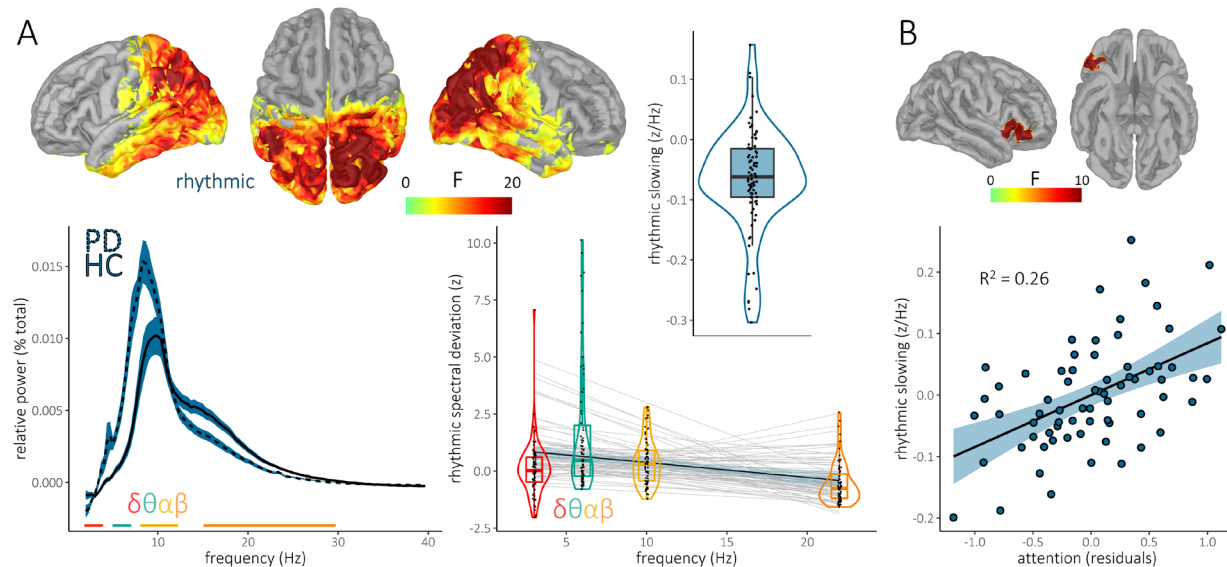

**Figure 4. Rhythmic neurophysiological slowing associated with clinical impairments in Parkinson's disease.** Similar to Figure 2, but with neurophysiological slowing computed using the rhythmic (i.e., aperiodic-corrected) component of the parameterized spectra. (A) Cortical maps indicate significant clusters of rhythmic neurophysiological slowing in patients with Parkinson's disease (PD) after stringent multiple comparisons correction. Power spectra to the bottom left indicate the underlying data used to compute neurophysiological slowing from the cortical vertex exhibiting the strongest effect, with colored bars underneath showing the bandwidths of typical frequency-band definitions used for averaging. The plot to the bottom right shows the individual patient spectral deviations at this same cortical vertex for each frequency band, with the light grey lines-of-best fit indicating individual neurophysiological slowing slopes, and the overlaid black line and blue shaded area representing the overall group effect and 95% confidence intervals, respectively. These individual and mean neurophysiological slowing effects are also represented as single dots in the scatterplot to the top right. (B) Cortical maps indicate the significant cluster where neurophysiological slowing was associated with attention function in patients with PD. Associated scatterplots indicate the nature and strength of this relationship at the cortical vertex exhibiting the strongest effect, with the line-of-best-fit, 95% confidence interval, and  $R^2$  value overlaid.

1 new non-parametric method and found evidence of significant posterior – anterior (1,000 permutations;  $b$   
 2 = 3.57,  $p = .002$ ) and superior – inferior (1,000 permutations;  $b = -5.64$ ,  $p = .004$ ) spatial gradients, such  
 3 that stronger slowing in superior parietal cortices related to worse clinical impairments, while greater  
 4 slowing in inferior frontal regions was associated with better preserved motor and cognitive functions  
 5 (Figure 5A). These spatial gradient effects did not differ between the rhythmic and arrhythmic slowing  
 6 models (1,000 permutations; posterior – anterior:  $p = .848$ ; superior – inferior:  $p > .999$ ; Figure 5B), and  
 7 remained significant after correction for confounds (i.e., head motion, eye movements, and heart rate  
 8 variability; 1,000 permutations; posterior – anterior:  $p < .001$ ; superior – inferior:  $p = .014$ ; Figure S2).

9 This anatomical-neurophysiological gradient was significantly modulated by meaningful PD clinical factors  
 10 (Figure 6). Patients who reported subjective cognitive complaints exhibited a weaker posterior – anterior  
 11 gradient effect than those who did not (1,000 permutations;  $\Delta b = -7.90$ ,  $p = .010$ ; Figure 6A). A similar effect  
 12 of dopamine agonist use was also observed, with those patients taking dopamine agonists showing a  
 13 weaker posterior – anterior gradient effect (1,000 permutations;  $\Delta b = -5.56$ ,  $p = .048$ ; Figure 6B). Further,  
 14 we discovered that the left – right gradient differed significantly based on the laterality of symptom onset  
 15 (1,000 permutations;  $\Delta b = -3.35$ ,  $p = .006$ ; Figure 6C), such that left-onset patients exhibited a bias toward  
 16 compensatory effects of cortical slowing in the left hemisphere, while we observed the mirrored effect in  
 17 right-onset patients. Post-hoc testing of significant clinical subgroup differences in these gradient effects  
 18 indicated that the dopamine agonist (1,000 permutations;  $p = .042$ ; Figure S2) and symptom laterality

- 1 (1,000 permutations;  $p = .032$ ; Figure S3) effects were specific to the model considering only motor
- 2 impairments, while the effect of subjective cognitive complaints was specific to cognitive abilities (1,000
- 3 permutations;  $p = .006$ ; Figure S4).

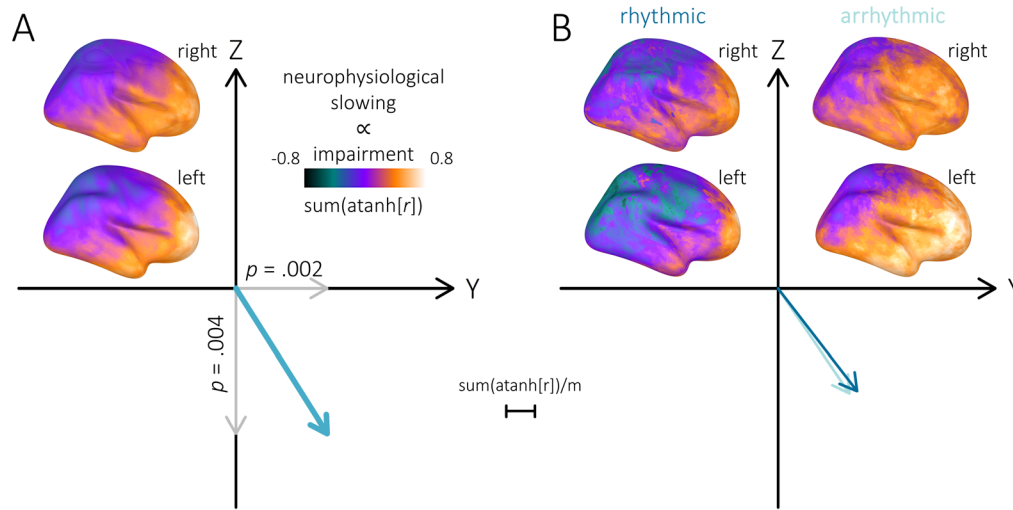

**Figure 5. Anatomical gradient of clinical effects of neurophysiological slowing in Parkinson's disease.** (A) Cortical maps indicate the nature and strength of relationships between neurophysiological slowing and clinical impairments (i.e., partial correlations linearly-scaled and summed across motor and cognitive domains) along the cortex of patients with Parkinson's disease, with lower values indicating a more pathological relationship (i.e., greater slowing predicts worse clinical deficits) and higher values indicating a possible compensatory effect. Grey vectors plotted along the cardinal anatomical axes are unstandardized beta weights from a multiple regression of the neurophysiological slowing – clinical impairment relationships on the relevant anatomical coordinates (X: left – right; Y: posterior – anterior; Z: inferior – superior), and indicate the magnitude and direction of the significant anatomical gradient effects. Overlaid p-values were generated using a non-parametric permutation approach and indicate statistical significance per each axis of the gradient effect. The blue vector indicates the magnitude and direction of the overall significant anatomical gradient effect. (B) Cortical maps again indicate the nature and strength of the neurophysiological slowing – clinical impairment relationships across the cortex of patients with Parkinson's disease, but with neurophysiological slowing computed using the rhythmic (left) and arrhythmic (right) components of the parameterized spectra separately. The significant anatomical gradient effects observed in the non-parameterized neurophysiological slowing data (panel A) did not differ between the rhythmic and arrhythmic models.

#### 4 *Clinical Effects of Cortical Slowing Selectively Co-Localize with Neurotransmitter Receptor Densities*

5 To test for spatial associations between the observed anatomical-neurophysiological gradient and  
6 normative neurochemical systems, we adapted the non-parametric method described above to data from  
7 *neuromaps*<sup>69</sup>. The relationship between neurophysiological slowing and clinical impairments co-localized  
8 selectively with normative densities of dopamine, serotonin, GABA, and norepinephrine systems, but not  
9 with densities of acetylcholine and glutamate systems, nor with overall synaptic density (Figure 7).  
10 Specifically, all three measures of dopaminergic density related positively to the anatomical-  
11 neurophysiological gradient (1,000 permutations; D1:  $\beta = 0.38$ ,  $p_{FDR} < .001$ ; D2:  $\beta = 0.40$ ,  $p_{FDR} = .024$ ; DAT:  
12  $\beta = 0.24$ ,  $p_{FDR} = .024$ ), such that regions with higher dopamine receptor/transporter density in health  
13 exhibited a compensatory effect of slowing in patients with PD. Similar positive associations were found for  
14 four of the six tested serotonergic density measures (1,000 permutations; 5-HT1a:  $\beta = 0.49$ ,  $p_{FDR} = .023$ ; 5-  
15 HT2a:  $\beta = 0.30$ ,  $p_{FDR} = .017$ ; 5-HT4:  $\beta = 0.43$ ,  $p_{FDR} = .024$ ; 5-HTT:  $\beta = 0.35$ ,  $p_{FDR} = .024$ ). In contrast, both  
16 GABAergic (1,000 permutations; GABAa:  $\beta = -0.34$ ,  $p_{FDR} = .038$ ) and noradrenergic (1,000 permutations;  
17 NET:  $\beta = -0.53$ ,  $p_{FDR} = .038$ ) densities related negatively to the gradient effect, such that regions with higher  
18 healthy receptor/transporter density exhibited a stronger pathological effect of cortical slowing in PD.



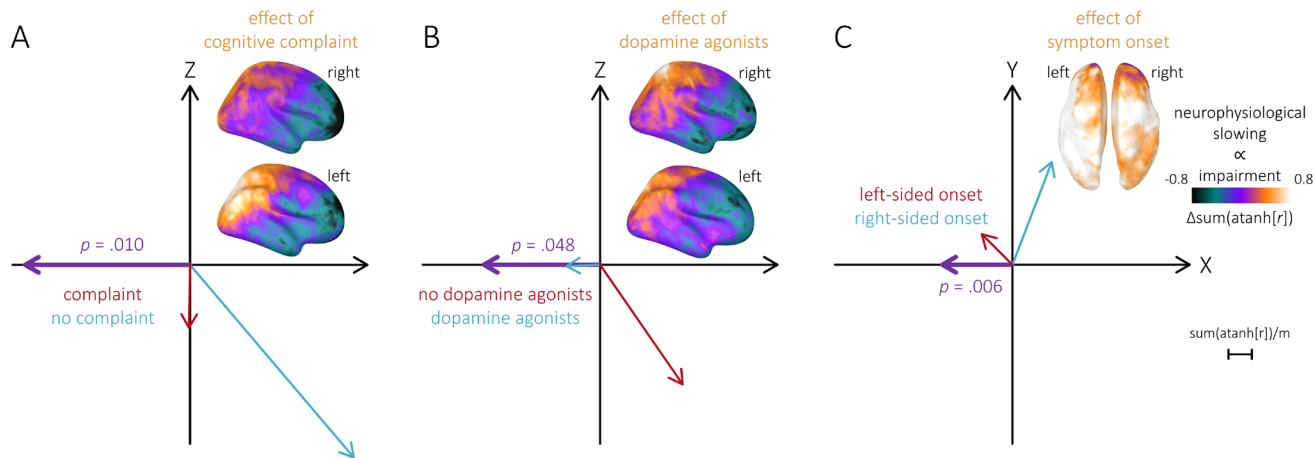

**Figure 6. The anatomical gradients of clinical effects of neurophysiological slowing in Parkinson's disease are clinically meaningful.** Cortical maps indicate differences in the nature and strength of relationships between neurophysiological slowing and clinical impairments in patients with Parkinson's disease, as a function of binary clinical features, including (A) the presence of subjective cognitive complaints, (B) the use of dopamine agonists, and (C) the laterality of initial symptom onset. Purple vectors plotted along the cardinal spatial axes are unstandardized beta weights from a multiple regression of the neurophysiological slowing – clinical impairment relationships on the relevant spatial coordinates (X: left – right; Y: posterior – anterior; Z: inferior – superior), subtracted between the two clinical feature subgroups. Overlaid p-values were generated using a non-parametric permutation approach and indicate statistical significance per each axis of the difference in the gradient effect. The blue and red vectors indicate the magnitude and direction of the overall anatomical gradient effects per each clinical feature subgroup.

### 1 *Inter-regional Functional Connectivity is Slowed in Parkinson's Disease*

2 Using the cortical location with the strongest neurophysiological slowing effect as a seed region (x: -50, y:  
 3 -77, z: 1), we examined whether functional connectivity between this region and the rest of the cortex also  
 4 exhibited a significant slowing effect in patients with PD. We found that inter-regional connections between  
 5 the seed region and a widely distributed network of frontal, somato-motor, and superior parietal regions  
 6 were significantly slowed in patients (TFCE;  $p_{FWE} < .001$ ; peak vertex = x: 14, y: -61, z: 70; Figure S3). No  
 7 significant relationships between this connectivity slowing effect and clinical outcomes were observed  
 8 when stringent corrections were applied for multiple comparisons across cortical locations, but the  
 9 magnitude of connectivity slowing at the peak of this effect did significantly relate to memory abilities ( $t(62)$   
 10 = 2.46,  $p = .017$ ). Both the connectivity slowing main effect and its relationship to memory scores were  
 11 robust to confounds (i.e., head motion, eye movements, heart rate variability, and the number of epochs  
 12 used per participant for analysis; main effect:  $p < .001$ ; memory relationship:  $p = .030$ ).

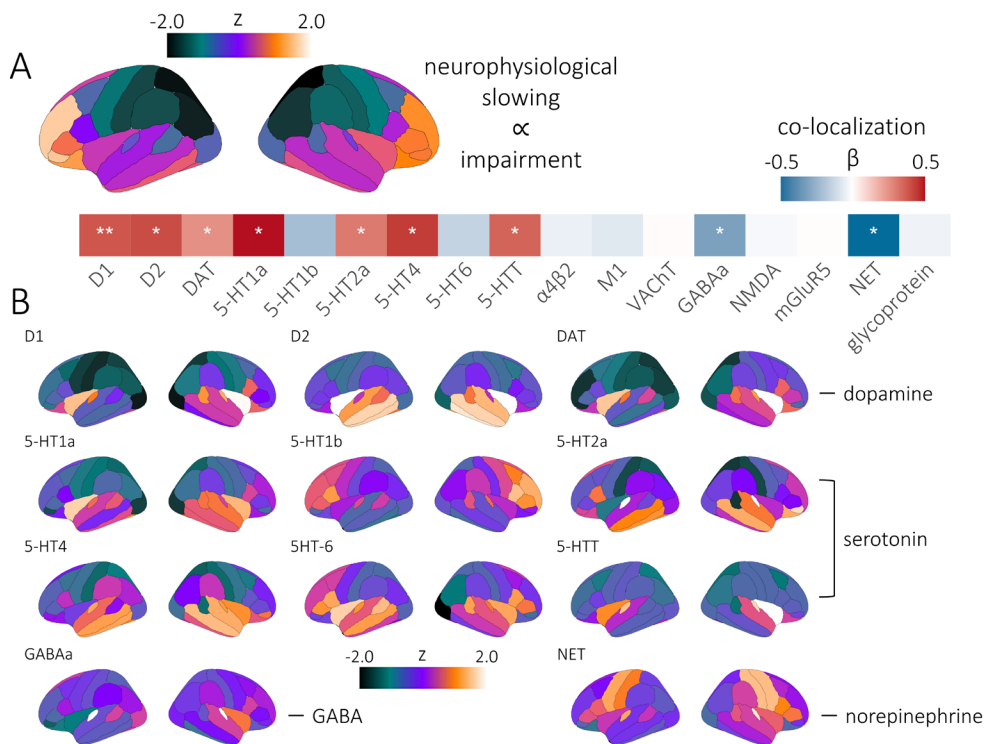

**Figure 7. Clinical effects of neurophysiological slowing selectively co-localize with receptor densities.** (A) Parcellated cortical maps indicate the nature and strength of relationships between neurophysiological slowing and clinical impairments (i.e., partial correlations linearly-scaled and summed across motor and cognitive domains, z-scored across brain regions) in patients with Parkinson’s disease. The vector heatmap below indicates the strength (standardized  $\beta$ ) and statistical significance ( $*p_{FDR} < .05$ ,  $**p_{FDR} < .005$ ) of co-localization between the neurophysiological slowing-clinical relationship and each neuromap measure, including dopamine (D1, D2, and DAT), serotonin (5-HT1a, 5-HT1b, 5-HT2a, 5-HT4, 5-HT6, 5-HTT), acetylcholine ( $\alpha 4\beta 2$ , M1, VAcHT), GABA (GABAa), glutamate (NMDA, mGluR5), norepinephrine (NET), and synapse density (glycoprotein). (B) Parcellated cortical maps indicate the density of each neuromap measure, z-scored across brain regions.

## 1 Discussion

2 After decades of literature suggesting a pathological shift in neurophysiological signal power from high to  
 3 low frequencies in patients with neurodegenerative disorders<sup>10-12,39-41,75-84</sup>, recent advances in capturing  
 4 these multi-spectral effects have documented their anatomical distribution and relevance to clinical  
 5 features<sup>19,42,52</sup>. In the current work, we advance this line of research in patients with Parkinson’s disease  
 6 using a marker of neurophysiological slowing that recently showed associations with cognitive impairments  
 7 and amyloid proteinopathy in patients with Alzheimer’s disease<sup>52</sup>.

8 We find that patients with PD do exhibit broad neurophysiological slowing effects across posterior parietal,  
 9 temporal, occipital, and inferior frontal cortices. This effect concerns both the rhythmic and arrhythmic  
 10 components of the neurophysiological spectrum. Further, we show that the magnitude of this slowing  
 11 effect is associated with individual cognitive and motor functions. Most notably, slowing across bilateral  
 12 fronto-temporal cortical regions is related to better language abilities, while slowing in an ensemble of  
 13 right-lateralized inferior frontal, somato-motor, and superior parietal regions is associated with worse  
 14 attention scores. Rhythmic and arrhythmic slowing are differentially related to these observations: the  
 15 relationship with language abilities was only recapitulated with arrhythmic slowing, while the relationship  
 16 with attention was found in both the rhythmic and arrhythmic analyses, but with differing anatomical  
 17 definitions. Arrhythmic slowing related to worse attention in right superior parietal regions, while rhythmic  
 18 slowing exhibited the same association in right inferior frontal cortex. We also found relationships involving  
 19 arrhythmic slowing that were not detected in the cortical slowing measures computed using the non-  
 20 parameterized spectra, including a robust association between arrhythmic cortical slowing and better  
 21 motor function (i.e., lower UPDRS-III scores) in bilateral prefrontal and anterior temporal cortices.  
 22 Together, these results highlight not only the potential clinical relevance of cortical slowing in patients with

1 PD, but also the insight gained by analyzing the respective effects of rhythmic and arrhythmic spectral  
2 features on neurophysiological slowing across patient populations.

3 At the macro-anatomical scale, we also show that the nature of these clinical-neurophysiological  
4 relationships varies across the cardinal sagittal axis of the brain. This anatomical-neurophysiological  
5 gradient indicates that slowing in superior and posterior cortices relates to worse clinical condition (i.e.,  
6 higher UPDRS-III and lower neuropsychological scores), while slowing in inferior and anterior regions is  
7 associated with better motor and cognitive abilities, indicating compensation. We also found that this  
8 gradient is affected by key clinical factors: it is reduced by a dopamine agonist regimen, and it is stronger  
9 in patients with no subjective cognitive complaints. Further, although no overall left – right anatomical  
10 gradient was observed across all patients with PD, a marked difference in the gradient effect was observed  
11 along this axis when patients were sorted according to the laterality of their initial symptom onset, such  
12 that cortical slowing related to clinical compensation on the less affected hemisphere.

13 We identify four neurochemical systems as candidate contributors to this clinical-neurophysiological  
14 gradient effect. In essence, we find that brain regions with higher normative dopamine and serotonin and  
15 lower GABA and norepinephrine densities tend to exhibit a compensatory effect of cortical slowing in these  
16 patients. All four of these neurotransmitter systems are impacted by PD<sup>85,86</sup>. In particular, loss of cortical  
17 dopamine systems is a strong predictor of cognitive dysfunction in PD<sup>87</sup>. In combination with our finding  
18 that the sagittal gradient of cortical slowing is normalized by the use of dopaminergic agonists, we interpret  
19 the dopaminergic co-localization of this effect as further evidence that neurophysiological compensation  
20 in PD is largely necessitated by frontal dopamine dysfunction. It should be noted, however, that  
21 manipulation of primary dopamine medications (i.e., levodopa) was not possible in this study, warranting  
22 caution when interpreting the causal nature of these effects.

23 Taken together, these results suggest that the clinical impact of expressions of aberrant neurophysiological  
24 activity in PD is dependent on their anatomical locus and neurochemical basis: the same multi-spectral  
25 neurophysiological patterns indicating impairment in one brain region indicate compensation elsewhere  
26 on the cortex. These findings may explain the highly variable clinical outcomes of anatomically-targeted  
27 rhythmic modulation of frequency-specific neurophysiological activity<sup>20-26</sup>. In fact, many of these studies  
28 have targeted the primary motor cortices, which our results indicate as a point of anatomical inflection  
29 along the compensation-impairment axis. We argue that future studies aiming to ameliorate cognitive and  
30 motor symptoms in patients with PD should be anatomically selective, normalizing cortical slowing in  
31 posterior parietal cortices, and/or enhancing cortical slowing over inferior frontal regions. Spatial targeting  
32 of neuromodulation might also be personalized per patient. For example, distinct protocols may be advised  
33 depending on the laterality of symptom onset, prescription of dopaminergic agonists, and/or presence of  
34 subjective cognitive complaints.

35 To our knowledge, this is also the first report of both rhythmic and arrhythmic contributors to  
36 neurophysiological slowing effects in any patient population. Separating these contributions allowed us to  
37 detect relationships to motor function and cognition that were not significant when using non-  
38 parameterized neurophysiological spectra. This provides evidence that rhythmic and arrhythmic slowing  
39 effects are at least partially distinct. We also anticipate these findings will impact ongoing research on  
40 rhythmic neuromodulation for the treatment of patients with neurodegenerative disorders. Although we  
41 report clinically-relevant rhythmic components of cortical slowing, we also find that shifts in the arrhythmic  
42 spectra are associated with clinical features. We foresee that future research will investigate whether the  
43 cortical slowing effects reported previously in other patient groups<sup>52,88,89</sup> exhibit similar distinctions  
44 between arrhythmic and rhythmic components of neurophysiological signals.

1 We also find that cortical slowing effects in PD are not confined to local changes in spectral power, but also  
2 affect frequency-specific inter-regional connectivity. The slowing effects of cortico-cortical functional  
3 connectivity reported herein may indicate a shift towards slower, more stable channels of  
4 neurophysiological communication in PD. However, this hypothesis needs to be tested directly in future  
5 work. We found that these connectivity slowing effects were widely distributed across the cortex, and  
6 argue that the data provide a proof-of-concept of the applicability of cortical slowing measures to other  
7 types of multi-spectral data (e.g., frequency-specific functional connectivity) and in other patient groups.

8 In sum, we show that patients with Parkinson’s disease exhibit neurophysiological slowing across multiple  
9 cortical regions, contributed by both rhythmic and arrhythmic spectral components. Cortical slowing is  
10 associated with worse motor function and cognition in superior parietal regions, but transitions to a  
11 compensatory effect along a superior – inferior and posterior – anterior anatomical gradient towards  
12 inferior frontal regions. This sagittal gradient effect indicates a need for more evidence-based targeting of  
13 neuromodulation therapies. We also demonstrate proof-of-concept for slowing of frequency-defined  
14 cortico-cortical functional connectivity in PD.

## 1 Methods

### 2 *Participants*

3 The Research Ethics Board at the Montreal Neurological Institute reviewed and approved this study.  
4 Written informed consent was obtained from every participant following detailed description of the study,  
5 and all research protocols complied with the Declaration of Helsinki. Exclusionary criteria for all participants  
6 included current neurological (other than PD) or psychiatric disorder; MEG contraindications; and unusable  
7 MEG or demographic data. All participants completed the same MEG protocols with the same instrument  
8 at the same site.

9 Patients with mild to moderate (Hoehn and Yahr scale: 1 – 3) idiopathic PD were enrolled in the Quebec  
10 Parkinson Network (QPN; <https://rpq-qpn.ca/>)<sup>53</sup> initiative, which comprises extensive clinical,  
11 neuroimaging, neuropsychological, and biological profiling of each participant. A final sample of 79  
12 participants with PD fulfilled the inclusion criteria. All patients with PD were prescribed a stable dosage of  
13 antiparkinsonian medication with satisfactory clinical response prior to study enrollment. Patients were  
14 instructed to take their medication as prescribed before research visits, and thus all data were collected in  
15 the practically-defined “ON” state.

16 Neuroimaging data from 65 healthy older adults were collated from the PREVENT-AD (N = 50)<sup>54</sup> and Open  
17 MEG Archive (OMEGA; N = 15)<sup>55</sup> data repositories to serve as a comparison group for the patients with PD.  
18 These participants were selected so that their demographic characteristics, including age (Mann-Whitney  
19 U test;  $W = 2349.50$ ,  $p = .382$ ), self-reported sex (chi-squared test;  $\chi^2 = 0.65$ ,  $p = .422$ ), handedness (chi-  
20 squared test;  $\chi^2 = 0.25$ ,  $p = .883$ ), and highest level of education (Mann-Whitney U test;  $W = 2502.50$ ,  $p =$   
21  $.444$ ), did not significantly differ from those of the patient group. Group demographic summary statistics  
22 and comparisons, as well as clinical summary statistics for the patient group, are provided in Table 1.

### 23 *Clinical & Neuropsychological Testing*

24 Standard clinical assessments were available for most of the patients with PD, including data regarding  
25 gross motor impairment (Unified Parkinson’s Disease Rating Scale – part III [UPDRS-III]; N = 61)<sup>56</sup>, general  
26 cognitive function (Montreal Cognitive Assessment [MoCA]; N = 70)<sup>57</sup>, disease staging (Hoehn & Yahr scale;  
27 N = 57)<sup>58,59</sup>, symptom onset asymmetry (N = 66), use of dopamine agonists (N = 66), and subjective cognitive  
28 complaints (N = 55).

29 The patients were also asked to complete a series of detailed neuropsychological tests, with a final sample  
30 of 69 participants with PD providing useable data. These tests concerned five domains of cognitive function  
31 impacted in PD: attention (Digit Span – Forward, Backward, and Sequencing; Trail Making Test Part A),  
32 executive function (Trail Making Test Part B; Stroop Test – Colors, Words, and Interference; Brixton Spatial  
33 Anticipation Test), memory (Hopkins Verbal Learning Test-Revised [HVLTR] – Learning Trials 1-3,  
34 Immediate and Delayed Recall; Rey Complex Figure Test [RCFT] – Immediate and Delayed Recall), language  
35 (Semantic Verbal Fluency – Animals & Actions; Phonemic Verbal Fluency – F, A & S; Boston Naming Test),  
36 and visuospatial function (Clock Drawing Test – Verbal Command & Copy Command; RCFT – Copy). To  
37 utilize as much available data as possible, missing values were excluded pairwise from analysis per each  
38 test. Negatively-scored test values were sign-inverted, the data for each individual test were standardized  
39 to the mean and standard deviation of the available sample, and these z-scores were then averaged within  
40 each domain listed above to derive domain-specific metrics of cognitive function. To corroborate the  
41 statistical independence of these domain composite scores, we computed a ratio of z-scores in the patient

1 group representing the mean of all pairwise relationships (i.e., linearly-scaled Pearson correlation  
2 coefficients) amongst intra-domain tests, divided by the mean of all relationships with inter-domain tests.  
3 All domains had a ratio of  $Z_{intra}/Z_{inter} > 1.50$ , and the mean  $Z_{intra}/Z_{inter}$  ratio over all domains was 2.12 (SD =  
4 0.30). This indicates that these domains were about twice more internally- than externally related on  
5 average. The mean across all five domains was also computed for each patient to represent general  
6 cognitive function. Importantly, as some participants were missing data on one or more tests within each  
7 domain, we verified that none of the domain scores were related to the number of tests used for their  
8 computation across individuals (attention:  $r = .04, p = .734$ ; memory:  $r = -.19, p = .124$ ; visuospatial function:  
9 no missing data; executive function:  $r = -.19, p = .117$ ; language:  $r = -.08, p = .539$ ; global function:  $r = -.14,$   
10  $p = .239$ ; all  $BF_{10}$ 's  $< 0.50$ ). Demographically-corrected neuropsychological data were not available for this  
11 study, therefore, demographic factors significantly covarying with cognitive domain scores were included  
12 as nuisance covariates in all relevant statistical models. No significant impact of self-reported sex, highest  
13 level of education, nor handedness was found on any of the neuropsychological domain scores (all  $p$ 's  $>$   
14  $.20$ ). In contrast, age was a moderate-to-strong predictor of neuropsychological testing performance  
15 (memory:  $r = -.34, p = .004$ ; attention:  $r = -.22, p = .068$ ; visuospatial function:  $r = -.54, p < .001$ ; executive  
16 function:  $r = -.43, p < .001$ ; language:  $r = -.26, p = .030$ ). Accordingly, all statistical analyses utilizing these  
17 neuropsychological data included age as a nuisance covariate.

## 18 *Magnetoencephalography Data Collection and Analyses*

19 Eyes-open resting-state MEG data were collected from each participant using a 275-channel whole-head  
20 CTF system (Port Coquitlam, British Columbia, Canada) at a sampling rate of 2400 Hz and with an  
21 antialiasing filter with a 600 Hz cut-off. Noise-cancellation was applied using CTF's software-based built-in  
22 third-order spatial gradient noise filters. Recordings lasted a minimum of 5 min<sup>60</sup> and were conducted with  
23 participants in the seated position as they fixated on a centrally-presented crosshair. The participants were  
24 monitored during data acquisition via real-time audio-video feeds from inside the MEG shielded room, and  
25 continuous head position was recorded during all sessions.

26 MEG preprocessing was performed with *Brainstorm*<sup>61</sup> unless otherwise specified, with default parameters  
27 and following good-practice guidelines<sup>62</sup>. The data were bandpass filtered between 1–200 Hz to reduce  
28 slow-wave drift and high-frequency noise, and notch filters were applied at the line-in frequency and  
29 harmonics (i.e., 60, 120 & 180 Hz). Signal space projectors (SSPs) were derived around cardiac and eye-  
30 blink events detected from ECG and EOG channels using the automated procedure available in  
31 *Brainstorm*<sup>63</sup>, reviewed and manually-corrected where necessary, and applied to the data. Additional SSPs  
32 were also used to attenuate stereotyped artifacts on an individual basis. Artifact-reduced MEG data were  
33 then epoched into non-overlapping 6-second blocks and downsampled to 600 Hz. Data segments still  
34 containing major artifacts (e.g., SQUID jumps) were excluded for each session on the basis of the union of  
35 two standardized thresholds of  $\pm 3$  median absolute deviations from the median: one for signal amplitude  
36 and one for its numerical gradient. An average of 79.72 (SD = 13.82) epochs were used for further analysis  
37 (patients: 83.78 [SD = 7.24]; controls: 74.77 [SD = 17.82]). Empty-room recordings lasting at least 2 minutes  
38 were collected on or near the same day as the data recordings and were processed using the same pipeline,  
39 with the exception of the artifact SSPs, to model environmental noise statistics for source analysis.

40 MEG data were coregistered to each individual's segmented T1-weighted MRI (*Freesurfer recon-all*)<sup>64</sup> using  
41 approximately 100 digitized head points. For participants without useable MRI data (N = 14 patients with  
42 PD; N = 3 healthy older adults), a quasi-individualized anatomy was created and coregistered with  
43 *Brainstorm* to the MEG data, by warping the default *Freesurfer* anatomy to the participant's head  
44 digitization points and anatomical landmarks<sup>65</sup>. Source imaging was performed per epoch using

1 individually-fitted overlapping-spheres head models (15,000 cortical vertices, with current flows of  
2 unconstrained orientation) and dynamic statistical parametric mapping (dSPM). Noise covariance  
3 estimated from the previously-mentioned empty-room recordings were used for the computation of the  
4 dSPM maps.

##### 5 *Analyses of Cortical & Functional Connectivity Slowing*

6 Cortical slowing was assessed per patient with PD using a previously-validated method<sup>52</sup>, implemented as  
7 a linear model of spectral power deviations from healthy participants as a function of frequency (Figure  
8 1A). This model is continuously-scaled, spatially-resolved, and unbiased by the natural differences in  
9 neurophysiological signal amplitude observed as a function of frequency. We computed vertex-wise  
10 estimates of power spectral density (PSD) from the source-imaged MEG data using Welch's method (3-s  
11 time windows with 50% overlap) and normalized the resulting PSD estimates to the total power of the  
12 frequency spectrum. These PSD data were next averaged over all artifact-free 6-second epochs for each  
13 participant, and the PSD root-mean-squares (RMS) across the three unconstrained current flow  
14 orientations at each cortical vertex location was projected onto a template cortical surface (*FSAverage*) for  
15 comparison across participants.

16 To disentangle the slowing effects due to rhythmic versus arrhythmic cortical activity in patients with PD,  
17 we parameterized the PSDs with *specparam* (*Brainstorm* Matlab version; frequency range = 2–40 Hz;  
18 Gaussian peak model; peak width limits = 0.5–12 Hz; maximum n peaks = 3; minimum peak height = 3 dB;  
19 proximity threshold = 2 standard deviations of the largest peak; fixed aperiodic; no guess weight)<sup>43</sup> and  
20 extracted the exponent of arrhythmic spectral components. The arrhythmic components of the power  
21 spectra were the aperiodic outputs of *specparam* and the rhythmic (i.e., aperiodic-corrected) spectra were  
22 derived by subtracting these arrhythmic components from the original PSDs. The PSD components were  
23 then averaged over canonical frequency bands (delta: 2–4 Hz; theta: 5–7 Hz; alpha: 8–12 Hz; beta: 15–29  
24 Hz)<sup>63</sup>. For each PD participant, the resulting PSD maps of spectrally-resolved estimates of  
25 neurophysiological signal power were normalized per frequency band to the mean and standard deviation  
26 of the comparable maps from the control group, resulting in cortical maps of PD spectral deviations from  
27 healthy variants. We then fit a linear model across the four frequency bands per each participant and  
28 cortical vertex location using the *polyfit* function in Matlab and extracted the model slope. This procedure  
29 yielded cortical maps of linear trends in spectral neurophysiological deviations per patient with PD. In these  
30 maps, cortical locations with flat slopes indicate locations of no substantial spectral change with respect to  
31 expected healthy variants, while more negative slopes indicate locations of stronger cortical slowing  
32 effects.

33 In addition to deriving maps of cortical slowing, we also used the source-imaged MEG data to investigate  
34 the potential for slowing of inter-regional functional connectivity in patients with PD. We extracted the first  
35 principal component from the three elementary source time series at each vertex location in each  
36 participant's native space, and derived whole-cortex functional connectivity maps, using the cortical  
37 location with the strongest overall slowing effect (back-transformed into each participant's native space)  
38 as the seed. We used orthogonalized amplitude envelope correlations (AEC)<sup>66,67</sup> as the connectivity  
39 measure, based on the same frequency-band definitions used for the previously-described cortical slowing  
40 derivations. We estimated connectivity over each epoch and averaged the resulting AEC estimates across  
41 epochs, yielding a single AEC map per participant and frequency band. We projected these individual AEC  
42 maps onto the same template cortical surface (*FSAverage*) for group analyses, and used the previously-  
43 described procedure to derive spatially-resolved maps of functional connectivity slowing per patient with  
44 PD.

## 1 *Testing of Cortical Clinical-Gradient Effects*

2 To ensure that gyrification of the pial surface did not bias our estimation of absolute distance between  
3 neighboring cortical locations, we applied a smoothing kernel to the template surface coordinate matrix  
4 using the *tess\_smooth* function in Brainstorm (100% smoothing; i.e., smoothing factor of 1 with 46  
5 iterations). We then used a two-step procedure to test for spatial gradients in the relationships between  
6 clinical impairments and neurophysiological slowing along the cortical surface (Figure 1B). We first modeled  
7 linear relationships at each cortical location between neurophysiological slowing and both motor (i.e.,  
8 UPDRS-III) and cognitive (i.e., mean cognitive domain scores) impairments, beyond the effects of age, using  
9 the *partialcorr* function in Matlab. The resulting Pearson correlation coefficient values were then  
10 normalized using the Fisher transform (i.e., the inverse hyperbolic tangent; using the *atanh* function in  
11 Matlab), the neuropsychology correlations were sign-reversed for comparability with those computed from  
12 the UPDRS-III scores, and the two were summed at each location to generate cortical maps of the  
13 association between neurophysiological slowing and clinical impairments. In the second step, we fit a  
14 multiple regression model to these data using the *regress* function in Matlab, with the summed Fisher-  
15 transformed correlation coefficients as the dependent variable and the three cardinal axes of the template  
16 brain space (i.e., X: left – right, Y: posterior – anterior, and Z: inferior – superior) as the independent  
17 predictors. The unstandardized beta weights for each predictor were extracted from this model,  
18 representing the absolute change in the slowing–clinical impairment relationship (i.e.,  $\text{sum}(\text{atanh}[r])$ ) per  
19 unit distance (i.e., meters) across the cortex. Where relevant, we also performed post-hoc testing  
20 separately for the motor (i.e., UPDRS-III) and cognitive (i.e., mean cognitive domain scores) impairment  
21 data using the same procedure.

## 22 *Co-localization with Normative Atlases of Neurotransmitter Receptor Density*

23 To determine the neurochemical systems that contribute to the observed cortical clinical-gradient effects,  
24 we adapted the two-step procedure described above, substituting as predictors region-wise estimates of  
25 normative neurotransmitter receptor/transporter density<sup>68,69</sup> for the cardinal spatial axis data. Mean  
26 cortical receptor distribution maps of 16 different receptors and transporters from 6 neurotransmitter  
27 systems were computed as in previous work<sup>68</sup> and parcellated using the Desikan-Killiany atlas<sup>70</sup>. These  
28 included dopamine (D1: 13 adults, [11C]SCH23390 PET; D2: 92, [11C]FLB-457, DAT: 174, [123I]-FP-CIT),  
29 serotonin (5-HT1a: 36, [11C]WAY-100635; 5-HT1b: 88, [11C]P943; 5-HT2a: 29, [11C]Cimbi-36; 5-HT4: 59,  
30 [11C]SB207145; 5-HT6: 30, [11C]GSK215083; 5-HTT: 100, [11C]DASB), acetylcholine ( $\alpha 4\beta 2$ : 30,  
31 [18F]flubatine; M1: 24, [11C]LSN3172176; VACHT: 30, [18F]FEOBV), GABA (GABAa: 16, [11C]flumazenil),  
32 glutamate (NMDA: 29, [18F]GE-179; mGluR5: 123, [11C]ABP688), and norepinephrine (NET: 77, [11C]MRB).  
33 In addition, to test the importance of total synapse density, we also extracted a similar map of synaptic  
34 vesicle glycoprotein 2A (76, [11C]UCB-J)<sup>71</sup>. To facilitate comparison of the clinical-gradient effects to these  
35 normative maps, we parcellated the source-imaged MEG PSDs using the mean within each region of the  
36 same atlas<sup>70</sup>, and recomputed the neurophysiological slowing metric per atlas region. These slowing values  
37 were then related to cognitive and motor function (controlling for effects of age), normalized (and, for the  
38 cognitive relationships, sign-reversed), and summed using the same procedure described for the clinical-  
39 gradient analysis (step 1). To enable comparisons across neurotransmitter systems, the density and  
40 neurophysiological slowing data were each standardized (i.e., z-scored) across cortical regions. Linear  
41 regressions were then used to derive standardized beta-weights representing the co-localization of the  
42 cortical clinical-gradient effect with each normative neurotransmitter map (step 2).



## 1 *Testing for Potential Confounds*

2 We investigated possible confound effects due to participant head motion, eye movements, and heart-rate  
3 variability. We extracted the head-position indicator, EOG, and ECG channel time series RMS, respectively.  
4 Alongside age and the number of trials used for analysis per participant, these derivations were included in  
5 *post hoc* statistical models to examine the robustness of the initial effect(s) of interest against potential  
6 confounds.

## 7 *Statistical Analyses*

8 Participants with missing data were excluded pairwise per model. A threshold of  $p < .05$  was used to indicate  
9 statistical significance, and all tests were performed two-tailed unless otherwise specified.

10 We derived statistical comparisons across the cortical maps produced, covarying out the effect of age, using  
11 *SPM12*. Initial tests used parametric general linear models, with secondary corrections of the resulting *F*-  
12 contrasts for multiple comparisons across cortical locations using Threshold-Free Cluster Enhancement  
13 (TFCE;  $E = 1.0$ ,  $H = 2.0$ ; 5,000 permutations)<sup>72</sup>. We applied a final cluster-wise threshold of  $p_{FWE} < .05$  to  
14 determine statistical significance, and used the TFCE clusters at this threshold to mask the original statistical  
15 values (i.e., vertex-wise *F* values) for visualization. We extracted data from the cortical location exhibiting  
16 the strongest statistical relationship in each cluster (i.e., the “peak vertex”) for subsequent analysis and  
17 visualization. Where appropriate, linear models were fit to these extracted data using the *lm* function in  
18 *R*<sup>73</sup>.

19 A non-parametric permutation approach was used to determine the statistical significance of the spatial  
20 gradient and neurotransmitter co-localization effects, wherein at each vertex the patient cortical slowing  
21 data were randomly permuted (using the *randperm* function in Matlab) and used to compute the partial  
22 correlations (step 1) and regressions (step 2). This process was repeated 1,000 times, and the resulting  
23 beta-weights were extracted to generate null distributions for each predictor. The original beta coefficients  
24 were then compared with their respective null distributions to generate non-parametric p-values. To test  
25 for significant subgroup effects on the spatial gradients based on binary clinical factors (i.e., subjective  
26 cognitive complaints, symptom onset laterality, and dopamine agonist use), we implemented the same  
27 two-step approach, using instead the difference in beta-weights (from step 2) between clinical groups as  
28 the statistic of interest.

## 29 *Data & Code Availability*

30 Data used in the preparation of this work are available through the Clinical Biospecimen Imaging and  
31 Genetic (C-BIG) repository (<https://www.mcgill.ca/neuro/open-science/c-big-repository>)<sup>53</sup>, the PREVENT-  
32 AD open resource (<https://openpreventad.loris.ca/>)<sup>54</sup>, and the OMEGA repository  
33 (<https://www.mcgill.ca/bic/resources/omega>)<sup>55</sup>. Normative neurotransmitter density data are available  
34 from *neuromaps* (<https://github.com/netneurolab/neuromaps>)<sup>69</sup>. Code for MEG preprocessing and the  
35 neurophysiological slowing and spatial gradient analyses is available at  
36 [https://github.com/aiwiesman/QPN\\_Slowing](https://github.com/aiwiesman/QPN_Slowing). Rejection of epochs containing artifacts was performed with  
37 the *ArtifactScanTool* (<https://github.com/nichrishayes/ArtifactScanTool>).

## References

- 1 Feigin, V. L. *et al.* Global, regional, and national burden of neurological disorders, 1990–2016: a systematic analysis for the Global Burden of Disease Study 2016. *The Lancet Neurology* **18**, 459-480 (2019).
- 2 Lang, A. E. & Lozano, A. M. Parkinson's disease. *New England Journal of Medicine* **339**, 1130-1143 (1998).
- 3 Park, A. & Stacy, M. Non-motor symptoms in Parkinson's disease. *J Neurol* **256 Suppl 3**, 293-298 (2009). [https://doi.org:10.1007/s00415-009-5240-1](https://doi.org/10.1007/s00415-009-5240-1)
- 4 Litvak, V. *et al.* Resting oscillatory cortico-subthalamic connectivity in patients with Parkinson's disease. *Brain* **134**, 359-374 (2011).
- 5 Boon, L. I. *et al.* Motor effects of deep brain stimulation correlate with increased functional connectivity in Parkinson's disease: An MEG study. *NeuroImage: Clinical* **26**, 102225 (2020).
- 6 Pollok, B. *et al.* Increased SMA–M1 coherence in Parkinson's disease—Pathophysiology or compensation? *Experimental Neurology* **247**, 178-181 (2013).
- 7 Hirschmann, J. *et al.* Differential modulation of STN-cortical and cortico-muscular coherence by movement and levodopa in Parkinson's disease. *Neuroimage* **68**, 203-213 (2013).
- 8 Stoffers, D. *et al.* Increased cortico-cortical functional connectivity in early-stage Parkinson's disease: an MEG study. *Neuroimage* **41**, 212-222 (2008).
- 9 Stoffers, D., Bosboom, J. L., Wolters, E. C., Stam, C. J. & Berendse, H. W. Dopaminergic modulation of cortico-cortical functional connectivity in Parkinson's disease: an MEG study. *Experimental neurology* **213**, 191-195 (2008).
- 10 Boon, L. I. *et al.* A systematic review of MEG-based studies in Parkinson's disease: The motor system and beyond. *Human brain mapping* **40**, 2827-2848 (2019).
- 11 Geraedts, V. J. *et al.* Clinical correlates of quantitative EEG in Parkinson disease: A systematic review. *Neurology* **91**, 871-883 (2018).
- 12 Morita, A., Kamei, S. & Mizutani, T. Relationship between slowing of the EEG and cognitive impairment in Parkinson disease. *Journal of Clinical Neurophysiology* **28**, 384-387 (2011).
- 13 Moran, R. J. *et al.* Alterations in brain connectivity underlying beta oscillations in Parkinsonism. *PLoS computational biology* **7**, e1002124 (2011).
- 14 Oswal, A., Brown, P. & Litvak, V. Synchronized neural oscillations and the pathophysiology of Parkinson's disease. *Current opinion in neurology* **26**, 662-670 (2013).
- 15 Helmich, R. C., Hallett, M., Deuschl, G., Toni, I. & Bloem, B. R. Cerebral causes and consequences of parkinsonian resting tremor: a tale of two circuits? *Brain* **135**, 3206-3226 (2012).
- 16 McCarthy, M. *et al.* Striatal origin of the pathologic beta oscillations in Parkinson's disease. *Proceedings of the National Academy of Sciences* **108**, 11620-11625 (2011).
- 17 Heinrichs-Graham, E. *et al.* Hypersynchrony despite pathologically reduced beta oscillations in patients with Parkinson's disease: a pharmaco-magnetoencephalography study. *Journal of Neurophysiology* **112**, 1739-1747 (2014).
- 18 Simon, O. B. *et al.* Profiling Parkinson's disease cognitive phenotypes via resting-state magnetoencephalography. *Journal of neurophysiology* **127**, 279-289 (2022).
- 19 Wiesman, A. I. *et al.* Aberrant neurophysiological signaling underlies speech impairments in Parkinson's disease. *medRxiv* (2022).
- 20 Del Felice, A. *et al.* Personalized transcranial alternating current stimulation (tACS) and physical therapy to treat motor and cognitive symptoms in Parkinson's disease: a randomized cross-over trial. *NeuroImage: Clinical* **22**, 101768 (2019).

- 21 Teo, W.-P., Hendy, A. M., Goodwill, A. M. & Loftus, A. M. Transcranial alternating current stimulation: a potential modulator for pathological oscillations in Parkinson's disease? *Frontiers in neurology* **8**, 185 (2017).
- 22 Fregni, F. *et al.* Noninvasive cortical stimulation with transcranial direct current stimulation in Parkinson's disease. *Movement disorders* **21**, 1693-1702 (2006).
- 23 Elahi, B., Elahi, B. & Chen, R. Effect of transcranial magnetic stimulation on Parkinson motor function—systematic review of controlled clinical trials. *Movement Disorders* **24**, 357-363 (2009).
- 24 Cantello, R., Tarletti, R. & Civardi, C. Transcranial magnetic stimulation and Parkinson's disease. *Brain research reviews* **38**, 309-327 (2002).
- 25 Benninger, D. H. *et al.* Transcranial direct current stimulation for the treatment of Parkinson's disease. *Journal of Neurology, Neurosurgery & Psychiatry* **81**, 1105-1111 (2010).
- 26 Chou, Y.-h., Hickey, P. T., Sundman, M., Song, A. W. & Chen, N.-k. Effects of repetitive transcranial magnetic stimulation on motor symptoms in Parkinson disease: a systematic review and meta-analysis. *JAMA neurology* **72**, 432-440 (2015).
- 27 Brys, M. *et al.* Multifocal repetitive TMS for motor and mood symptoms of Parkinson disease: a randomized trial. *Neurology* **87**, 1907-1915 (2016).
- 28 Pereira, J. B. *et al.* Modulation of verbal fluency networks by transcranial direct current stimulation (tDCS) in Parkinson's disease. *Brain stimulation* **6**, 16-24 (2013).
- 29 Brown, P. Oscillatory nature of human basal ganglia activity: relationship to the pathophysiology of Parkinson's disease. *Movement disorders: official journal of the Movement Disorder Society* **18**, 357-363 (2003).
- 30 Cassidy, M. *et al.* Movement-related changes in synchronization in the human basal ganglia. *Brain* **125**, 1235-1246 (2002).
- 31 Hammond, C., Bergman, H. & Brown, P. Pathological synchronization in Parkinson's disease: networks, models and treatments. *Trends in neurosciences* **30**, 357-364 (2007).
- 32 Hirschmann, J. *et al.* Distinct oscillatory STN-cortical loops revealed by simultaneous MEG and local field potential recordings in patients with Parkinson's disease. *Neuroimage* **55**, 1159-1168 (2011).
- 33 Hutchison, W. D. *et al.* Neuronal oscillations in the basal ganglia and movement disorders: evidence from whole animal and human recordings. *Journal of Neuroscience* **24**, 9240-9243 (2004).
- 34 Kühn, A. A. *et al.* High-frequency stimulation of the subthalamic nucleus suppresses oscillatory  $\beta$  activity in patients with Parkinson's disease in parallel with improvement in motor performance. *Journal of Neuroscience* **28**, 6165-6173 (2008).
- 35 Weinberger, M. *et al.* Beta oscillatory activity in the subthalamic nucleus and its relation to dopaminergic response in Parkinson's disease. *Journal of neurophysiology* **96**, 3248-3256 (2006).
- 36 Little, S. & Brown, P. The functional role of beta oscillations in Parkinson's disease. *Parkinsonism & related disorders* **20**, S44-S48 (2014).
- 37 Giannicola, G. *et al.* The effects of levodopa and ongoing deep brain stimulation on subthalamic beta oscillations in Parkinson's disease. *Experimental neurology* **226**, 120-127 (2010).
- 38 Quinn, E. J. *et al.* Beta oscillations in freely moving Parkinson's subjects are attenuated during deep brain stimulation. *Movement Disorders* **30**, 1750-1758 (2015).
- 39 Soikkeli, R., Partanen, J., Soininen, H., Pääkkönen, A. & Riekkinen Sr, P. Slowing of EEG in Parkinson's disease. *Electroencephalography and clinical neurophysiology* **79**, 159-165 (1991).
- 40 Stoffers, D. *et al.* Slowing of oscillatory brain activity is a stable characteristic of Parkinson's disease without dementia. *Brain* **130**, 1847-1860 (2007).
- 41 Vardy, A. N. *et al.* Slowing of M1 activity in Parkinson's disease during rest and movement—an MEG study. *Clinical Neurophysiology* **122**, 789-795 (2011).
- 42 Kroesche, M. *et al.* Slowing of Frontocentral Beta Oscillations in Atypical Parkinsonism. *bioRxiv* (2022).

- 43 Donoghue, T. *et al.* Parameterizing neural power spectra into periodic and aperiodic components. *Nature neuroscience* **23**, 1655-1665 (2020).
- 44 Donoghue, T., Dominguez, J. & Voytek, B. Electrophysiological frequency band ratio measures conflate periodic and aperiodic neural activity. *Eneuro* **7** (2020).
- 45 Donoghue, T., Schaworonkow, N. & Voytek, B. Methodological considerations for studying neural oscillations. *European Journal of Neuroscience* (2021).
- 46 Ostlund, B. D., Alperin, B. R., Drew, T. & Karalunas, S. L. Behavioral and cognitive correlates of the aperiodic (1/f-like) exponent of the EEG power spectrum in adolescents with and without ADHD. *Developmental cognitive neuroscience* **48**, 100931 (2021).
- 47 Kim, J. *et al.* Dopamine depletion can be predicted by the aperiodic component of subthalamic local field potentials. *Neurobiology of Disease* **168**, 105692 (2022).
- 48 Oswal, A. *et al.* Neural signatures of hyperdirect pathway activity in Parkinson's disease. *Nature communications* **12**, 1-14 (2021).
- 49 Hirschmann, J., Steina, A., Vesper, J., Florin, E. & Schnitzler, A. Neuronal oscillations predict deep brain stimulation outcome in Parkinson's disease. *Brain Stimulation* (2022).
- 50 Zhang, J., Villringer, A. & Nikulin, V. V. Dopaminergic modulation of local non-oscillatory activity and global-network properties in Parkinson's disease: an EEG study. *Frontiers in Aging Neuroscience* **14**, 846017 (2022).
- 51 Vinding, M. C. *et al.* Different features of the cortical sensorimotor rhythms are uniquely linked to the severity of specific symptoms in Parkinson's disease. *medRxiv* (2021).
- 52 Wiesman, A. I. *et al.* Spatially resolved neural slowing predicts impairment and amyloid burden in Alzheimer's disease. *Brain* (2022). [https://doi.org:10.1093/brain/awab430](https://doi.org/10.1093/brain/awab430)
- 53 Gan-Or, Z. *et al.* The Quebec Parkinson network: a researcher-patient matching platform and multimodal biorepository. *Journal of Parkinson's disease* **10**, 301-313 (2020).
- 54 Tremblay-Mercier, J. *et al.* Open Science Datasets from PREVENT-AD, a Longitudinal Cohort of Pre-symptomatic Alzheimer's Disease. *NeuroImage: Clinical*, 102733 (2021).
- 55 Niso, G. *et al.* OMEGA: the open MEG archive. *Neuroimage* **124**, 1182-1187 (2016).
- 56 Goetz, C. G. *et al.* Movement Disorder Society-sponsored revision of the Unified Parkinson's Disease Rating Scale (MDS-UPDRS): scale presentation and clinimetric testing results. *Movement disorders: official journal of the Movement Disorder Society* **23**, 2129-2170 (2008).
- 57 Nasreddine, Z. S. *et al.* The Montreal Cognitive Assessment, MoCA: a brief screening tool for mild cognitive impairment. *J Am Geriatr Soc* **53**, 695-699 (2005). [https://doi.org:10.1111/j.1532-5415.2005.53221.x](https://doi.org/10.1111/j.1532-5415.2005.53221.x)
- 58 Hoehn, M. M. & Yahr, M. D. Parkinsonism: onset, progression, and mortality. *Neurology* **50**, 318-318 (1998).
- 59 Goetz, C. G. *et al.* Movement Disorder Society Task Force report on the Hoehn and Yahr staging scale: status and recommendations the Movement Disorder Society Task Force on rating scales for Parkinson's disease. *Movement disorders* **19**, 1020-1028 (2004).
- 60 Wiesman, A. I., da Silva Castanheira, J. & Baillet, S. Stability of spectral estimates in resting-state magnetoencephalography: Recommendations for minimal data duration with neuroanatomical specificity. *Neuroimage* **247**, 118823 (2022). [https://doi.org:10.1016/j.neuroimage.2021.118823](https://doi.org/10.1016/j.neuroimage.2021.118823)
- 61 Tadel, F., Baillet, S., Mosher, J. C., Pantazis, D. & Leahy, R. M. Brainstorm: a user-friendly application for MEG/EEG analysis. *Computational intelligence and neuroscience* **2011** (2011).
- 62 Gross, J. *et al.* Good practice for conducting and reporting MEG research. *Neuroimage* **65**, 349-363 (2013).
- 63 Niso, G. *et al.* Brainstorm pipeline analysis of resting-state data from the open MEG archive. *Frontiers in neuroscience* **13**, 284 (2019).
- 64 Fischl, B. FreeSurfer. *Neuroimage* **62**, 774-781 (2012).

- 65 Tadel, F. *et al.* MEG/EEG group analysis with brainstorm. *Frontiers in neuroscience* **13**, 76 (2019).
- 66 Bruns, A., Eckhorn, R., Jokeit, H. & Ebner, A. Amplitude envelope correlation detects coupling  
among incoherent brain signals. *Neuroreport* **11**, 1509-1514 (2000).
- 67 Colclough, G. L., Brookes, M. J., Smith, S. M. & Woolrich, M. W. A symmetric multivariate leakage  
correction for MEG connectomes. *Neuroimage* **117**, 439-448 (2015).
- 68 Hansen, J. Y. *et al.* Mapping neurotransmitter systems to the structural and functional organization  
of the human neocortex. *Biorxiv* (2021).
- 69 Markello, R. D. *et al.* Neuromaps: structural and functional interpretation of brain maps. *BioRxiv*  
(2022).
- 70 Desikan, R. S. *et al.* An automated labeling system for subdividing the human cerebral cortex on  
MRI scans into gyral based regions of interest. *Neuroimage* **31**, 968-980 (2006).
- 71 Hansen, J. Y. *et al.* Molecular and connectomic vulnerability shape cross-disorder cortical  
abnormalities. *bioRxiv* (2022).
- 72 Smith, S. M. & Nichols, T. E. Threshold-free cluster enhancement: addressing problems of  
smoothing, threshold dependence and localisation in cluster inference. *Neuroimage* **44**, 83-98  
(2009).
- 73 Team, R. C. (R Foundation for Statistical Computing, Vienna, Austria, 2017).
- 74 Yeo, B. T. *et al.* The organization of the human cerebral cortex estimated by intrinsic functional  
connectivity. *Journal of neurophysiology* (2011).
- 75 Osipova, D., Ahveninen, J., Jensen, O., Ylikoski, A. & Pekkonen, E. Altered generation of  
spontaneous oscillations in Alzheimer's disease. *Neuroimage* **27**, 835-841 (2005).  
<https://doi.org/10.1016/j.neuroimage.2005.05.011>
- 76 Engels, M. *et al.* Alzheimer's disease: the state of the art in resting-state magnetoencephalography.  
*Clinical Neurophysiology* **128**, 1426-1437 (2017).
- 77 Fernández, A. *et al.* Focal temporoparietal slow activity in Alzheimer's disease revealed by  
magnetoencephalography. *Biological psychiatry* **52**, 764-770 (2002).
- 78 Penttilä, M., Partanen, J. V., Soininen, H. & Riekkinen, P. Quantitative analysis of occipital EEG in  
different stages of Alzheimer's disease. *Electroencephalography and clinical neurophysiology* **60**, 1-  
6 (1985).
- 79 Schreiter-Gasser, U., Gasser, T. & Ziegler, P. Quantitative EEG analysis in early onset Alzheimer's  
disease: a controlled study. *Electroencephalography and clinical neurophysiology* **86**, 15-22 (1993).
- 80 Huang, C. *et al.* Discrimination of Alzheimer's disease and mild cognitive impairment by equivalent  
EEG sources: a cross-sectional and longitudinal study. *Clinical Neurophysiology* **111**, 1961-1967  
(2000).
- 81 Bosboom, J. *et al.* Resting state oscillatory brain dynamics in Parkinson's disease: an MEG study.  
*Clinical Neurophysiology* **117**, 2521-2531 (2006).
- 82 Dauwels, J. *et al.* Slowing and loss of complexity in Alzheimer's EEG: two sides of the same coin?  
*International journal of Alzheimer's disease* **2011** (2011).
- 83 Berendse, H., Verbunt, J., Scheltens, P., Van Dijk, B. & Jonkman, E. Magnetoencephalographic  
analysis of cortical activity in Alzheimer's disease: a pilot study. *Clinical Neurophysiology* **111**, 604-  
612 (2000).
- 84 de Haan, W. *et al.* Resting-state oscillatory brain dynamics in Alzheimer disease. *Journal of Clinical  
Neurophysiology* **25**, 187-193 (2008).
- 85 Scatton, B., Javoy-Agid, F., Rouquier, L., Dubois, B. & Agid, Y. Reduction of cortical dopamine,  
noradrenaline, serotonin and their metabolites in Parkinson's disease. *Brain research* **275**, 321-328  
(1983).
- 86 van Nuland, A. J. *et al.* GABAergic changes in the thalamocortical circuit in Parkinson's disease.  
*Human Brain Mapping* **41**, 1017-1029 (2020).

- 87 Aarsland, D. *et al.* Parkinson disease-associated cognitive impairment. *Nature Reviews Disease Primers* **7**, 1-21 (2021).
- 88 Boord, P. *et al.* Electroencephalographic slowing and reduced reactivity in neuropathic pain following spinal cord injury. *Spinal cord* **46**, 118-123 (2008).
- 89 Doesburg, S. M. *et al.* Magnetoencephalography reveals slowing of resting peak oscillatory frequency in children born very preterm. *Pediatric research* **70**, 171-175 (2011).

## 1 Acknowledgments

2 This work was supported by grant F32-NS119375 to AIW from the United States National Institutes of  
3 Health (NIH); to JDSC as a doctoral fellowship from Natural Science and Engineering Research Council of  
4 Canada (NSERC); to EAF as a Foundation Grant from the Canadian Institutes of Health Research (CIHR; FDN-  
5 154301) and the CIHR Canada Research Chair (Tier 1) of Parkinson's Disease; and to SB from by a NSERC  
6 Discovery grant, the Healthy Brains for Healthy Lives initiative of McGill University under the Canada First  
7 Research Excellence Fund, the CIHR Canada Research Chair (Tier 1) of Neural Dynamics of Brain Systems  
8 and the NIH (1R01EB026299). Data collection and sharing for this project was provided by the Quebec  
9 Parkinson Network (QPN), the Pre-symptomatic Evaluation of Novel or Experimental Treatments for  
10 Alzheimer's Disease (PREVENT-AD; release 6.0) program, and the Open MEG Archives (OMEGA). The  
11 funders had no role in study design, data collection and analysis, decision to publish, or preparation of the  
12 manuscript.

13 The QPN is funded by a grant from Fonds de recherche du Québec - Santé (FRQS). PREVENT-AD was  
14 launched in 2011 as a \$13.5 million, 7-year public-private partnership using funds provided by McGill  
15 University, the FRQS, an unrestricted research grant from Pfizer Canada, the Levesque Foundation, the  
16 Douglas Hospital Research Centre and Foundation, the Government of Canada, and the Canada Fund for  
17 Innovation. Private sector contributions are facilitated by the Development Office of the McGill University  
18 Faculty of Medicine and by the Douglas Hospital Research Centre Foundation (<http://www.douglas.qc.ca/>).  
19 OMEGA and the Brainstorm app are supported by funding to SB from the NIH (R01-EB026299), a Discovery  
20 grant from the Natural Science and Engineering Research Council of Canada (436355-13), the CIHR Canada  
21 research Chair in Neural Dynamics of Brain Systems, the Brain Canada Foundation with support from Health  
22 Canada, and the Innovative Ideas program from the Canada First Research Excellence Fund, awarded to  
23 McGill University for the HBHL initiative.

## 1 Figure Legends

2 **Figure 1. Neurophysiological slowing and anatomical gradient analyses.** (A) Neural slowing computation.  
3 Source-imaged magnetoencephalography (MEG) data is first frequency-transformed and the vertex-wise  
4 power spectral densities (PSD) parameterized using *specparam*. The resulting PSDs are averaged over  
5 typical frequency bands (i.e., delta: 2–4 Hz; theta: 5–7 Hz; alpha: 8–12 Hz; beta: 15–29 Hz) and each  
6 spectrally- and spatially-resolved power estimate of neurophysiological signal per patient is normalized to  
7 the mean and standard deviation of the comparable estimates in the healthy control group. Within each  
8 patient and at each spatial location, a linear model is then fit to these spectral deviations across  
9 frequencies, and the slope of this model is extracted that represents the relative slowing (i.e., negative  
10 slope values) of brain activity relative to healthy levels. This procedure is performed per cortical vertex,  
11 resulting in a spatially-resolved map of neurophysiological slowing per patient. (B) Spatial gradient analysis.  
12 Cortical surfaces are first smoothed to reduce the impact of gyrification on the estimation of spatial  
13 gradient effects. Per each vertex location, neurophysiological slowing values are separately correlated with  
14 motor (i.e., UPDRS-III scores) and cognitive (i.e., sign-reversed neuropsychological scores averaged over  
15 cognitive domains) impairments, beyond the effects of age. These partial correlation maps are then  
16 linearly-scaled (i.e., using the Fisher-transform) and summed per vertex, resulting in a single cortical map  
17 showing the nature and strength of the relationships between neurophysiological slowing and clinical  
18 impairments across the brain. A linear multiple regression is then fit to these data and the beta weights  
19 extracted, with each of the cardinal axes (X: left – right; Y: posterior – anterior; Z: inferior – superior)  
20 represented as a predictor. The neurophysiological slowing data are then randomly permuted across  
21 patients and the partial correlation and spatial multiple regression steps repeated 1,000 times, with the  
22 resulting beta weights extracted and used to build null distributions per each predictor. To test for the  
23 effect of binary clinical factors on these gradients, the same procedure is performed within each binarized  
24 patient subgroup, with the difference in beta weights between the two subgroups used as the statistic of  
25 interest.

26 **Figure 2. Neurophysiological slowing associated with cognitive abilities in Parkinson’s disease.** (A) Cortical  
27 maps indicate significant clusters of neurophysiological slowing in patients with Parkinson’s disease (PD)  
28 after stringent multiple comparisons correction. Power spectra to the bottom left indicate the underlying  
29 data used to compute neurophysiological slowing from the cortical vertex exhibiting the strongest effect,  
30 with colored bars underneath showing the bandwidths of typical frequency-band definitions used for  
31 averaging. The plot to the bottom right shows the individual patient spectral deviations at this same cortical  
32 vertex for each frequency band, with the light grey lines-of-best fit indicating individual neurophysiological  
33 slowing slopes, and the overlaid black line and blue shaded area representing the overall group effect and  
34 95% confidence intervals, respectively. These individual and mean neurophysiological slowing effects are  
35 also represented as single dots in the scatterplot to the top right. (B) Cortical maps indicate significant  
36 clusters where neurophysiological slowing was associated with cognitive function in patients with PD.  
37 Associated scatterplots indicate the nature and strength of this relationship at the cortical vertex exhibiting  
38 the strongest effect, with lines-of-best-fit, 95% confidence intervals, and  $R^2$  values overlaid.

39 **Figure 3. Arrhythmic neurophysiological slowing associated with clinical impairments in Parkinson’s disease.**  
40 Similar to Figure 2, but with neurophysiological slowing computed using the arrhythmic (i.e., aperiodic)  
41 component of the parameterized spectra. (A) Cortical maps indicate significant clusters of arrhythmic



1 neurophysiological slowing in patients with Parkinson's disease (PD) after stringent multiple comparisons  
2 correction. Power spectra to the bottom left indicate the underlying data used to compute  
3 neurophysiological slowing from the cortical vertex exhibiting the strongest effect, with colored bars  
4 underneath showing the bandwidths of typical frequency-band definitions used for averaging. The plot to  
5 the bottom right shows the individual patient spectral deviations at this same cortical vertex for each  
6 frequency, with the light grey lines-of-best fit indicating individual neurophysiological slowing slopes, and  
7 the overlaid black line and blue shaded area representing the overall group effect and 95% confidence  
8 intervals, respectively. These individual and mean neurophysiological slowing effects are also represented  
9 as single dots in the scatterplot to the top right. (B) Cortical maps indicate significant clusters where  
10 neurophysiological slowing was associated with cognitive function in patients with PD. Associated  
11 scatterplots indicate the nature and strength of this relationship at the cortical vertex exhibiting the  
12 strongest effect, with lines-of-best-fit, 95% confidence intervals, and  $R^2$  values overlaid.

13 **Figure 4. Rhythmic neurophysiological slowing associated with clinical impairments in Parkinson's disease.**

14 Similar to Figure 2, but with neurophysiological slowing computed using the rhythmic (i.e., aperiodic-  
15 corrected) component of the parameterized spectra. (A) Cortical maps indicate significant clusters of  
16 rhythmic neurophysiological slowing in patients with Parkinson's disease (PD) after stringent multiple  
17 comparisons correction. Power spectra to the bottom left indicate the underlying data used to compute  
18 neurophysiological slowing from the cortical vertex exhibiting the strongest effect, with colored bars  
19 underneath showing the bandwidths of typical frequency-band definitions used for averaging. The plot to  
20 the bottom right shows the individual patient spectral deviations at this same cortical vertex for each  
21 frequency band, with the light grey lines-of-best fit indicating individual neurophysiological slowing slopes,  
22 and the overlaid black line and blue shaded area representing the overall group effect and 95% confidence  
23 intervals, respectively. These individual and mean neurophysiological slowing effects are also represented  
24 as single dots in the scatterplot to the top right. (B) Cortical maps indicate the significant cluster where  
25 neurophysiological slowing was associated with attention function in patients with PD. Associated  
26 scatterplots indicate the nature and strength of this relationship at the cortical vertex exhibiting the  
27 strongest effect, with the line-of-best-fit, 95% confidence interval, and  $R^2$  value overlaid.

28 **Figure 5. Anatomical gradient of clinical effects of neurophysiological slowing in Parkinson's disease.** (A)

29 Cortical maps indicate the nature and strength of relationships between neurophysiological slowing and  
30 clinical impairments (i.e., partial correlations linearly-scaled and summed across motor and cognitive  
31 domains) along the cortex of patients with Parkinson's disease, with lower values indicating a more  
32 pathological relationship (i.e., greater slowing predicts worse clinical deficits) and higher values indicating  
33 a possible compensatory effect. Grey vectors plotted along the cardinal anatomical axes are  
34 unstandardized beta weights from a multiple regression of the neurophysiological slowing – clinical  
35 impairment relationships on the relevant anatomical coordinates (X: left – right; Y: posterior – anterior; Z:  
36 inferior – superior), and indicate the magnitude and direction of the significant anatomical gradient effects.  
37 Overlaid  $p$ -values were generated using a non-parametric permutation approach and indicate statistical  
38 significance per each axis of the gradient effect. The blue vector indicates the magnitude and direction of  
39 the overall significant anatomical gradient effect. (B) Cortical maps again indicate the nature and strength  
40 of the neurophysiological slowing – clinical impairment relationships across the cortex of patients with  
41 Parkinson's disease, but with neurophysiological slowing computed using the rhythmic (left) and  
42 arrhythmic (right) components of the parameterized spectra separately. The significant anatomical

1 gradient effects observed in the non-parameterized neurophysiological slowing data (panel A) did not differ  
2 between the rhythmic and arrhythmic models.

3 **Figure 6. The anatomical gradients of clinical effects of neurophysiological slowing in Parkinson’s disease are**  
4 **clinically meaningful.** Cortical maps indicate differences in the nature and strength of relationships between  
5 neurophysiological slowing and clinical impairments in patients with Parkinson’s disease, as a function of  
6 binary clinical features, including (A) the presence of subjective cognitive complaints, (B) the use of  
7 dopamine agonists, and (C) the laterality of initial symptom onset. Purple vectors plotted along the cardinal  
8 spatial axes are unstandardized beta weights from a multiple regression of the neurophysiological slowing  
9 – clinical impairment relationships on the relevant spatial coordinates (X: left – right; Y: posterior – anterior;  
10 Z: inferior – superior), subtracted between the two clinical feature subgroups. Overlaid  $p$ -values were  
11 generated using a non-parametric permutation approach and indicate statistical significance per each axis  
12 of the difference in the gradient effect. The blue and red vectors indicate the magnitude and direction of  
13 the overall anatomical gradient effects per each clinical feature subgroup.

14 **Figure 7. Clinical effects of neurophysiological slowing selectively co-localize with receptor densities.** (A)  
15 Parcellated cortical maps indicate the nature and strength of relationships between neurophysiological  
16 slowing and clinical impairments (i.e., partial correlations linearly-scaled and summed across motor and  
17 cognitive domains, z-scored across brain regions) in patients with Parkinson’s disease. The vector  
18 heatmap below indicates the strength (standardized  $\beta$ ) and statistical significance ( $*p_{FDR} < .05$ ,  $**p_{FDR} <$   
19  $.005$ ) of co-localization between the neurophysiological slowing-clinical relationship and each *neuromap*  
20 measure, including dopamine (D1, D2, and DAT), serotonin (5-HT1a, 5-HT1b, 5-HT2a, 5-HT4, 5-HT6, 5-  
21 HTT), acetylcholine ( $\alpha4\beta2$ , M1, VAcHT), GABA (GABAa), glutamate (NMDA, mGluR5), norepinephrine  
22 (NET), and synapse density (glycoprotein). (B) Parcellated cortical maps indicate the density of each  
23 *neuromap* measure, z-scored across brain regions.

**Table 1.** Group demographic comparisons and patient group clinical profile.

|                  | Age<br>(years)   | Sex<br>(% male)       | Handedness<br>(# left/ambi) | Education<br>(years)                               |                                        |                                     |
|------------------|------------------|-----------------------|-----------------------------|----------------------------------------------------|----------------------------------------|-------------------------------------|
| HC (N = 65)      | 63.02 (8.13)     | 64.62                 | 3/3                         | 15.85 (3.72)*                                      |                                        |                                     |
| PD (N = 79)      | 64.60 (8.21)     | 70.89                 | 5/3                         | 15.05 (3.04)                                       |                                        |                                     |
| <i>p</i>         | .382             | .422                  | .883                        | .444                                               |                                        |                                     |
|                  | MoCA<br>(N = 70) | UPDRS-III<br>(N = 61) | Hoehn &<br>Yahr<br>(N = 57) | % Reporting<br>Cognitive<br>Complaints<br>(N = 55) | % Left<br>Symptom<br>Onset<br>(N = 66) | % Taking<br>DA Agonists<br>(N = 66) |
| PD               |                  |                       |                             |                                                    |                                        |                                     |
| <b>Range</b>     | 12 – 30          | 7 – 71                | 1 – 3                       | -                                                  | -                                      | -                                   |
| <b>Mean (SD)</b> | 24.39 (3.98)     | 32.44 (14.64)         | 1.90 (0.70)                 | 58.18                                              | 51.52                                  | 31.82                               |

HC: healthy control group; PD: Parkinson’s disease group; MoCA: Montreal Cognitive Assessment; UPDRS-III: Unified Parkinson’s Disease Rating Scale part III; DA: Dopamine. Unless otherwise indicated, values indicate means and associated parentheses indicate standard deviations. P-values indicate significance of between-groups Mann-Whitney U tests and chi-square tests for continuous and categorical variables, respectively. \*N = 59; highest level of education was not reported by six HC participants.
